# Supplementary material
Source: HighWire-hosted journal article supplement (https://heart.bmj.com/content/108/9/717)
Supplement: inline-supplementary-material-1 [file inline-supplementary-material-1.pdf]

Cohen et al- 1

## Supplementary Material

Cohen DJ, et al.

Cost-effectiveness of Transcatheter Edge to Edge Repair in Secondary Mitral Regurgitation:  
A UK NHS Perspective

**Supplementary Table A: Baseline Characteristics**

|                             | <b>TMVr<br/>N = 302</b> | <b>GRMT<br/>N = 312</b> | <b>P-Value</b> |
|-----------------------------|-------------------------|-------------------------|----------------|
| Age (years)*                | 74 [65, 80]             | 74 [67, 81]             | 0.501          |
| Men                         | 201 (67%)               | 192 (62%)               | 0.195          |
| STS Risk Score (%)*         | 7.0 [3.8, 10.5]         | 7.0 [4.0, 11.1]         | 0.308          |
| Hypertension                | 243 (81%)               | 251(80%)                | 0.996          |
| Hyperlipidaemia             | 166 (55%)               | 163 (52%)               | 0.498          |
| Diabetes Mellitus           | 106 (35%)               | 123 (39%)               | 0.268          |
| Coronary Artery Disease     | 218 (72%)               | 228 (73%)               | 0.804          |
| Prior Myocardial Infarction | 156 (52%)               | 160 (51%)               | 0.926          |
| Prior PCI                   | 130 (43%)               | 153 (49%)               | 0.136          |
| Prior CABG                  | 121 (40%)               | 126 (40%)               | 0.935          |
| Prior Stroke or TIA         | 56 (19%)                | 49 (16%)                | 0.350          |
| Peripheral Arterial Disease | 52 (17%)                | 57 (18%)                | 0.733          |
| Atrial Fibrillation/Flutter | 173 (57%)               | 166 (53%)               | 0.309          |
| COPD                        | 71 (24%)                | 72 (23%)                | 0.899          |
| Type of Cardiomyopathy      |                         |                         | 0.929          |
| Ischemic                    | 184 (61%)               | 189 (61%)               |                |
| Non-Ischemic                | 118 (39%)               | 123 (39%)               |                |
| LV Ejection Fraction (%)*   | 31 [24, 37]             | 30 [24, 37]             | 0.759          |
| NYHA Class III or IV        | 172 (57%)               | 201 (65%)               | 0.051          |
| Prior CRT therapy           | 115 (38%)               | 109 (35%)               | 0.418          |

Abbreviations: STS – Society of Thoracic Surgery; PCI – percutaneous coronary intervention; CABG – coronary artery bypass grafting; TIA – transient ischemic attack; COPD – chronic obstructive pulmonary disease; LV – left ventricular; NYHA – New York Heart Association; CRT – cardiac resynchronization therapy

\* Continuous variables are summarised as median values and interquartile ranges

Supplementary Table B: In-Trial Utilities

| Time Point | TMVr          | GRMT          | Mean Difference<br>(95% Confidence Interval) | P-Value |
|------------|---------------|---------------|----------------------------------------------|---------|
| Baseline   | 0.632 ± 0.108 | 0.619 ± 0.110 | 0.012 (-0.005 to 0.030)                      | 0.162   |
| 1 Month    | 0.690 ± 0.115 | 0.629 ± 0.120 | 0.061 (0.042 to 0.080)                       | < 0.001 |
| 6 Months   | 0.687 ± 0.108 | 0.632 ± 0.115 | 0.055 (0.036 to 0.073)                       | < 0.001 |
| 12 Months  | 0.682 ± 0.107 | 0.647 ± 0.123 | 0.035 (0.014 to 0.056)                       | 0.001   |
| 24 Months  | 0.683 ± 0.120 | 0.640 ± 0.116 | 0.043 (0.019 to 0.067)                       | < 0.001 |

Cohen et al- 4

**Supplementary Table C: Projected Lifetime Costs, Life-years, and Incremental Cost-Effectiveness Ratios under Base Case Assumptions and Sensitivity Analyses**

|                                                       | Lifetime Costs |         |         | Life Years |      |      | ICER (£/LY) | Probability < £20,000 per LY | Probability < £30,000 per LY |
|-------------------------------------------------------|----------------|---------|---------|------------|------|------|-------------|------------------------------|------------------------------|
|                                                       | TMVr           | GRMT    | Δ       | TMVr       | GRMT | Δ    |             |                              |                              |
| Base Case                                             | £51,029        | £31,902 | £19,128 | 5.18       | 4.06 | 1.11 | £17,140     | 76%                          | 96%                          |
| Discount Rate                                         |                |         |         |            |      |      |             |                              |                              |
| 0%                                                    | £59,970        | £37,990 | £21,980 | 6.56       | 4.98 | 1.57 | £13,973     | 92%                          | 99%                          |
| 5%                                                    | £47,966        | £29,655 | £18,311 | 4.70       | 3.72 | 0.98 | £18,685     | 65%                          | 94%                          |
| MitraClip Device Cost                                 |                |         |         |            |      |      |             |                              |                              |
| £0                                                    | £35,294        | £31,902 | £3,393  | 5.18       | 4.06 | 1.12 | £3,040      | 100%                         | 100%                         |
| £13,200 (-20%)                                        | £47,882        | £31,902 | £15,981 | 5.18       | 4.06 | 1.12 | £14,320     | 92%                          | 99%                          |
| £19,800 (+20%)                                        | £54,176        | £31,902 | £22,275 | 5.18       | 4.06 | 1.12 | £19,960     | 53%                          | 92%                          |
| Index Procedure Costs*                                |                |         |         |            |      |      |             |                              |                              |
| ↓ 50%                                                 | £49,786        | £31,902 | £17,885 | 5.18       | 4.06 | 1.12 | £16,026     | 84%                          | 98%                          |
| ↑ 50%                                                 | £52,272        | £31,902 | £20,371 | 5.18       | 4.06 | 1.12 | £18,254     | 67%                          | 95%                          |
| Varying Benefit of TMVr                               |                |         |         |            |      |      |             |                              |                              |
| “Best Case” Scenario <sup>†</sup>                     | £49,881        | £31,902 | £17,979 | 5.96       | 4.06 | 1.90 | £9,468      | 99%                          | 100%                         |
| “Worst Case” Scenario <sup>‡</sup>                    | £51,240        | £31,902 | £19,338 | 4.99       | 4.06 | 0.93 | £20,816     | 46%                          | 88%                          |
| Heart Transplant/LVAD = Death                         | £50,389        | £30,862 | £19,528 | 5.06       | 3.87 | 1.20 | 16,328      | 83%                          | 98%                          |
| Excluding non-HF related costs in years of life added | £44,774        | £31,902 | £12,873 | 5.18       | 4.06 | 1.11 | £11,535     | 92%                          | 98%                          |

Abbreviations: TMVr – transcatheter mitral valve repair; GRMT – guideline directed medical therapy; Δ – Difference; ICER – incremental cost-effectiveness ratio; LY – life year.

\* Excluding the cost of the MitraClip device

<sup>†</sup> Best Case Scenario: Survival benefit, health status benefit and cost benefit observed at 2 years remains constant throughout patient’s lifetime

<sup>‡</sup> Worst Case Scenario: No further survival benefit, health status benefit or cost benefit after 2 years (i.e., hazard ratio = 1; Δ cost = 0; Δ utilities = 0)

Cohen et al- 5

**Supplementary Table D: Subgroup Analyses (Benefit in Life Years)**

|                                  | Lifetime Costs |         |         | Life Years |      |      | ICER (£/LY) | Probability < £20,000 per LY | Probability < £30,000 per LY |
|----------------------------------|----------------|---------|---------|------------|------|------|-------------|------------------------------|------------------------------|
|                                  | TMVr           | GRMT    | Δ       | TMVr       | GRMT | Δ    |             |                              |                              |
| Base Case                        | £51,029        | £31,902 | £19,128 | 5.18       | 4.06 | 1.11 | £17,140     | 76%                          | 96%                          |
| Age                              |                |         |         |            |      |      |             |                              |                              |
| < 75 (n=323)                     | £66,282        | £45,729 | £20,553 | 7.33       | 5.62 | 1.71 | £12,026     | 95%                          | 99%                          |
| ≥ 75 (n=291)                     | £34,804        | £15,977 | £18,827 | 2.89       | 2.26 | 0.63 | £30,123     | 7%                           | 49%                          |
| Sex                              |                |         |         |            |      |      |             |                              |                              |
| Male (n=393)                     | £45,915        | £26,980 | £18,935 | 4.37       | 3.36 | 1.01 | £18,822     | 58%                          | 90%                          |
| Female (n=221)                   | £61,341        | £39,777 | £21,564 | 6.81       | 5.18 | 1.63 | £13,213     | 87%                          | 95%                          |
| STS Risk score                   |                |         |         |            |      |      |             |                              |                              |
| < 8 (n=352)                      | £62,115        | £40,875 | £21,240 | 6.74       | 5.22 | 1.52 | £13,974     | 92%                          | 98%                          |
| ≥ 8 (n=262)                      | £35,679        | £20,289 | £15,390 | 3.01       | 2.56 | 0.45 | £34,124     | 10%                          | 40%                          |
| Aetiology of Cardiomyopathy      |                |         |         |            |      |      |             |                              |                              |
| Ischaemic (n=373)                | £43,221        | £26,635 | £16,586 | 4.23       | 3.56 | 0.67 | £24,792     | 30%                          | 66%                          |
| Non-Ischaemic (n=241)            | £63,215        | £39,994 | £23,221 | 6.65       | 4.82 | 1.83 | £12,710     | 92%                          | 98%                          |
| Baseline LVEF                    |                |         |         |            |      |      |             |                              |                              |
| < 30% (n=274)                    | £55,549        | £34,046 | £21,504 | 5.76       | 3.79 | 1.97 | £10,932     | 100%                         | 100%                         |
| ≥ 30% (n=301)                    | £47,761        | £30,143 | £17,618 | 4.82       | 4.28 | 0.54 | £32,386     | 17%                          | 45%                          |
| Baseline Mitral Regurgitation    |                |         |         |            |      |      |             |                              |                              |
| 3+ (n=320)                       | £50,443        | £32,168 | £18,275 | 5.26       | 4.33 | 0.92 | £19,800     | 52%                          | 80%                          |
| 4+ (n=293)                       | £51,651        | £31,431 | £20,220 | 5.11       | 3.69 | 1.42 | £14,209     | 87%                          | 96%                          |
| Baseline Tricuspid Regurgitation |                |         |         |            |      |      |             |                              |                              |
| Moderate or Severe (n=98)        | £48,181        | £28,198 | £19,982 | 5.14       | 2.71 | 2.43 | £8,240      | 99%                          | 100%                         |
| Mild or less (n=501)             | £51,444        | £32,436 | £19,008 | 5.17       | 4.27 | 0.90 | £21,027     | 44%                          | 81%                          |
| NYHA Class                       |                |         |         |            |      |      |             |                              |                              |
| I or II (n=240)                  | £55,016        | £34,940 | £20,076 | 5.59       | 4.46 | 1.13 | £17,766     | 61%                          | 82%                          |
| III (n=322)                      | £46,750        | £30,301 | £16,449 | 4.78       | 3.92 | 0.86 | £19,171     | 53%                          | 79%                          |
| IV (n=51)                        | £58,186        | £29,001 | £29,185 | 5.45       | 3.03 | 2.08 | £14,058     | 73%                          | 83%                          |

Abbreviations: TMVr – transcatheter mitral valve repair. GRMT – guideline directed medical therapy. Δ – Difference. NYHA - New York Heart Association. LY – life year. ICER – incremental cost effectiveness ratio. LVEF – left ventricular ejection fraction.
